# Supplementary material for: Vertical Ground Displacements and Its Impact on Erosion along the Karachi Coastline, Pakistan
Source: MDPI journal article supplement (doi:10.3390/rs14092054), 2022-04-25
Supplement: s1 [file s1]

Archive with 1 entries (1 files):
- remotesensing-1651577-supplementary.pdf
