# Supplementary material for: Vertical Ground Displacements and Its Impact on Erosion along the Karachi Coastline, Pakistan
Source: MDPI journal article supplement (doi:10.3390/rs14092054), 2022-04-25
Supplement: s1 [file s1 › remotesensing-1651577-supplementary.pdf]

# SUPPLEMENTARY MATERIALS TABLES

TABLE S1  
COASTAL EVOLUTION AND POSSIBLE CONTRIBUTION AT EACH SECTION OF KARACHI COAST

| ENVISAT/ASAR SLC List |                    |                  |
|-----------------------|--------------------|------------------|
| 17 September 2004     | 31 December 2004   | 11 March 2005    |
| 15 April 2005         | 20 May 2005        | 24 June 2005     |
| 29 July 2005          | 02 September 2005* | 11 November 2005 |
| 20 January 2006       | 24 February 2006   | 31 March 2006    |
| 22 September 2006     | 27 October 2006    | 09 February 2007 |
| 16 March 2007         | 20 April 2007      | 12 October 2007  |
| 25 January 2008       | 13 June 2008       | 18 July 2008     |
| 22 August 2008        | 26 September 2008  | 31 October 2008  |
| 05 December 2008      | 09 January 2009    | 25 December 2009 |
| 05 March 2010         | 09 April 2010      | 14 May 2010      |
| 18 June 2010          | 23 July 2010       | 01 October 2010  |

TABLE S2  
SENTINEL-1A SLC IMAGES USED FOR GROUND DISPLACEMENTS MONITORING DURING 2014-2016 PERIOD OVER KARACHI (\*MASTER IMAGE)  
S1A IW SLC (sub-swath 1 & 2, path 42 frame 74,75,76)

|                  |                   |                   |
|------------------|-------------------|-------------------|
| 08 October 2014  | 11 July 2015      | 07 March 2016     |
| 01 November 2014 | 28 August 2015*   | 31 March 2016     |
| 25 November 2014 | 21 September 2015 | 24 April 2016     |
| 12 January 2015  | 15 October 2015   | 11 June 2016      |
| 05 February 2015 | 02 December 2015  | 22 August 2016    |
| 30 April 2015    | 26 December 2015  | 15 September 2016 |
| 24 May 2015      | 19 January 2016   | 09 October 2016   |
| 17 June 2015     | 12 February 2016  |                   |

TABLE S3  
DETAILS OF LANDSAT IMAGES USED IN THE STUDY FOR COASTLINE DELINEATION AND EROSION ESTIMATION

| Data           | Sensor | Acquisition Time | Acquisition Date | Tidal Height | Source                                                                        |
|----------------|--------|------------------|------------------|--------------|-------------------------------------------------------------------------------|
| Landsat Images | TM     | 05:26:11 UTC     | 3-Apr-89         | 1.90 m       | USGS<br>( <a href="https://espa.cr.usgs.gov/">https://espa.cr.usgs.gov/</a> ) |
|                | TM     | 05:41:59 UTC     | 6-Apr-99         | 2.5 m        |                                                                               |
|                | TM     | 05:44:13 UTC     | 10-Apr-09        | 0.1 m        |                                                                               |
|                | OLI    | 05:56:49 UTC     | 2-Mar-18         | 2.80 m       |                                                                               |

SUPPLEMENTARY MATERIALS FIGURES

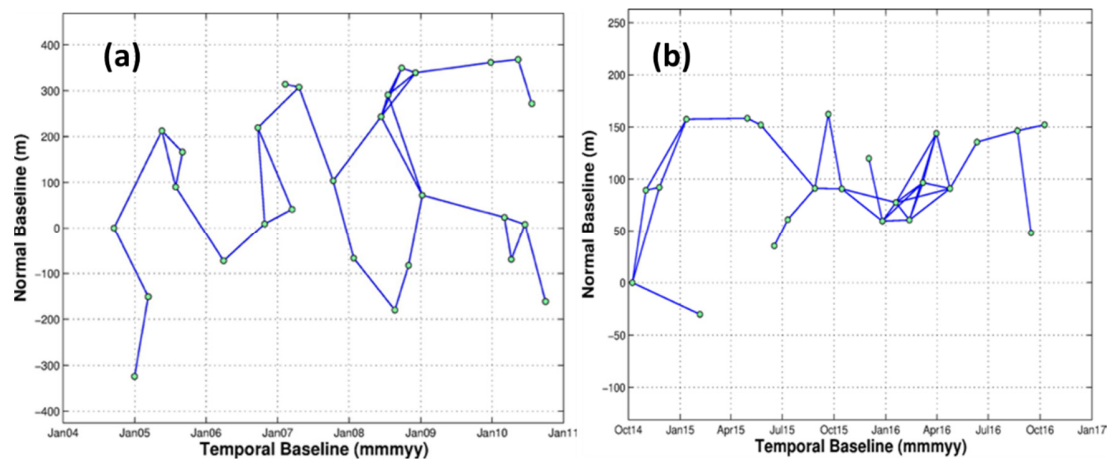

Figure S1 Perpendicular and temporal baselines of the selected interferometric pairs (blue line) (a) ENVISAT ASAR, and (b) Sentinel-1A IW SLC (green dots).

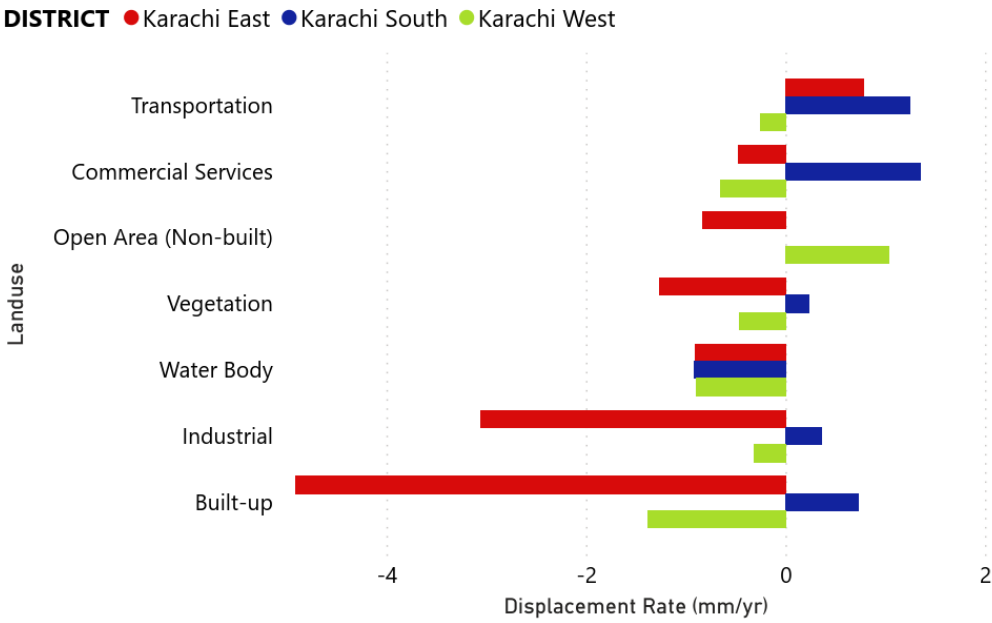

Figure S2 Ground displacement in different land use land cover areas in the study area.

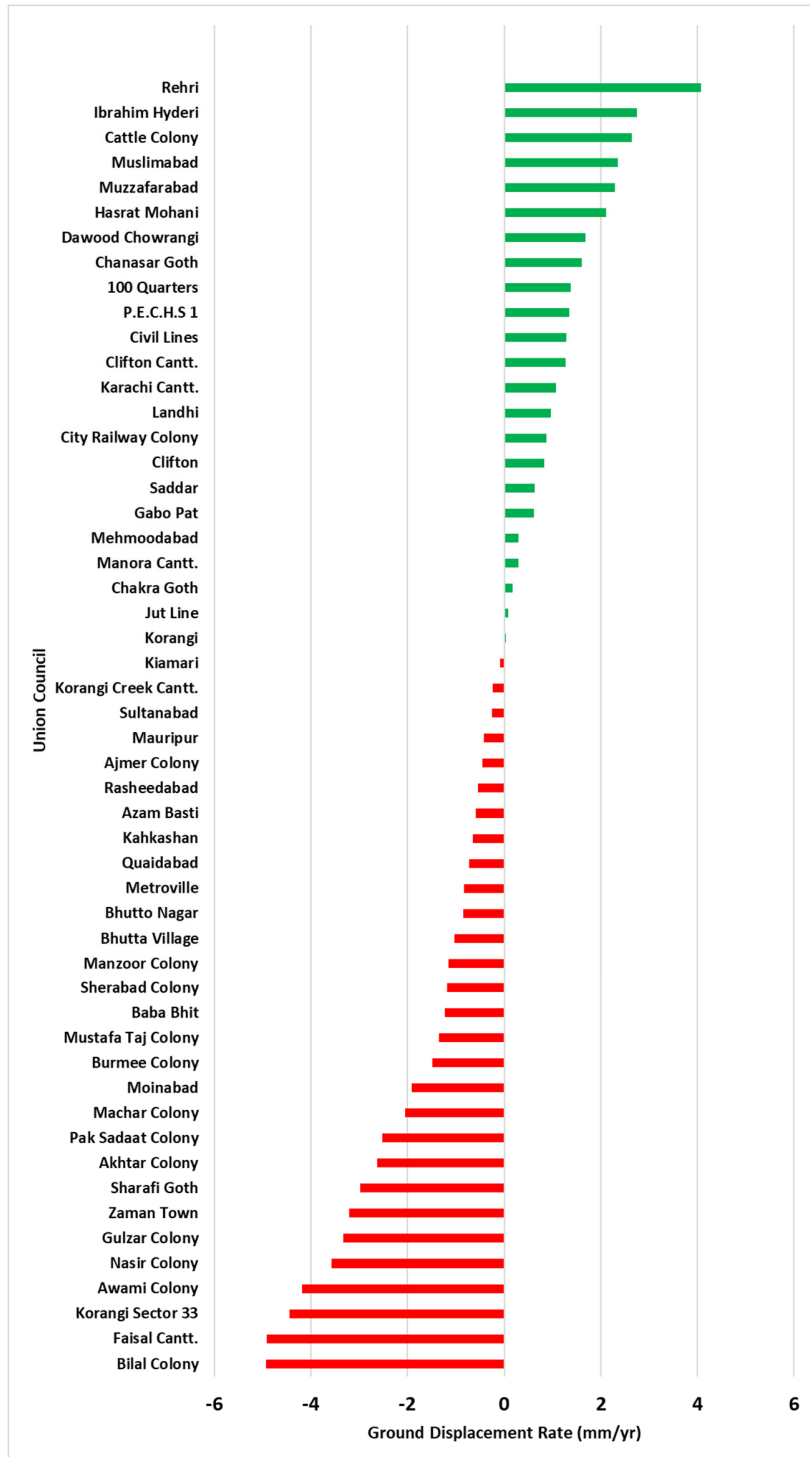

Figure S3 Union council wise localized assessment on ground displacement.
